# Supplementary material for: Synthesis of silyl iron dinitrogen complexes for activation of dihydrogen and catalytic silylation of dinitrogen
Source: Royal Society of Chemistry journal article supplement (doi:10.1039/d1dt02832d), 2021-01-01
Supplement: d1dt02832d1.pdf [file d1dt02832d1.pdf]

## Supporting Information

### Synthesis of Silyl Iron Dinitrogen Complexes for Activation of Dihydrogen and Catalytic Silylation of Dinitrogen

Guoliang Chang,<sup>a</sup> Peng Zhang,<sup>a</sup> Wenjing Yang,<sup>a</sup> Yanhong Dong,<sup>a</sup> Shangqing Xie,<sup>a</sup>  
Hongjian Sun,<sup>a</sup> Xiaoyan Li<sup>a,\*</sup>, Olaf Fuhr,<sup>b</sup> and Dieter Fenske<sup>b</sup>

<sup>a</sup>*School of Chemistry and Chemical Engineering, Key Laboratory of Special Functional Aggregated Materials, Ministry of Education, Shandong University, Shanda Nanlu 27, 250100 Jinan, People's Republic of China*

<sup>b</sup>*Institut für Nanotechnologie (INT) und Karlsruher Nano-Micro-Facility (KNMF), Karlsruher Institut für Technologie (KIT), Hermann-von-Helmholtz-Platz 1, 76344 Eggenstein-Leopoldshafen, Germany*

|                                                                                                                                            |    |
|--------------------------------------------------------------------------------------------------------------------------------------------|----|
| <b>1. Table S1.</b> Crystallographic Data for Complexes <b>1 - 4</b>                                                                       | S2 |
| <b>2. Table S2.</b> Crystallographic Data for Complexes <b>5 - 7</b>                                                                       | S3 |
| <b>3. IR, <sup>1</sup>H, <sup>31</sup>P, <sup>13</sup>C, <sup>29</sup>Si NMR Spectra of Complexes <b>1, 2, 3, 4, 5, 6</b> and <b>7</b></b> | S4 |

**1. Table S1.** Crystallographic Data for Complexes **1 - 4**

|                                                                         | <b>1</b>                                                           | <b>2</b>                                                           | <b>3</b>                                                           | <b>4</b>                                            |
|-------------------------------------------------------------------------|--------------------------------------------------------------------|--------------------------------------------------------------------|--------------------------------------------------------------------|-----------------------------------------------------|
| formula                                                                 | C <sub>28</sub> H <sub>49</sub> FeN <sub>2</sub> P <sub>3</sub> Si | C <sub>33</sub> H <sub>51</sub> FeN <sub>2</sub> P <sub>3</sub> Si | C <sub>30</sub> H <sub>47</sub> FeN <sub>2</sub> P <sub>3</sub> Si | C <sub>30</sub> H <sub>47</sub> FeP <sub>3</sub> Si |
| <i>M<sub>z</sub></i>                                                    | 590.54                                                             | 652.61                                                             | 612.54                                                             | 584.52                                              |
| crystal system                                                          | monoclinic                                                         | triclinic                                                          | tetragonal                                                         | monoclinic                                          |
| space group                                                             | P2 <sub>1</sub> /n                                                 | P-1                                                                | Pbca                                                               | P2 <sub>1</sub> /n                                  |
| <i>a</i> /Å                                                             | 13.4753(4)                                                         | 9.9876(3)                                                          | 16.2215(6)                                                         | 9.1689(2)                                           |
| <i>b</i> /Å                                                             | 17.1665(4)                                                         | 10.4113(3)                                                         | 16.2215(6)                                                         | 16.6564(3)                                          |
| <i>c</i> /Å                                                             | 13.9116(4)                                                         | 36.5579(6)                                                         | 24.4132(11)                                                        | 21.0278(5)                                          |
| $\alpha$ /°                                                             | 90                                                                 | 96.856(2)                                                          | 90                                                                 | 90                                                  |
| $\beta$ /°                                                              | 105.988(2)                                                         | 91.687(2)                                                          | 90                                                                 | 101.511(2)                                          |
| $\gamma$ /°                                                             | 90                                                                 | 116.430(2)                                                         | 90                                                                 | 90                                                  |
| <i>V</i> [Å <sup>3</sup> ]                                              | 3093.60(15)                                                        | 3365.15(16)                                                        | 6424.0(4)                                                          | 3146.79(12)                                         |
| <i>T</i> [K]                                                            | 153.15                                                             | 172.99(10)                                                         | 173.0(5)                                                           | 180                                                 |
| <i>Z</i>                                                                | 4                                                                  | 2                                                                  | 8                                                                  | 4                                                   |
| $\mu$ [mm <sup>-1</sup> ]                                               | 5.884                                                              | 5.463                                                              | 5.689                                                              | 3.831                                               |
| total reflns                                                            | 15684                                                              | 32434                                                              | 35686                                                              | 36536                                               |
| unique reflns                                                           | 4868                                                               | 13063                                                              | 5715                                                               | 7553                                                |
| <i>R</i> <sub>int</sub>                                                 | 0.0267                                                             | 0.0426                                                             | 0.0851                                                             | 0.0150                                              |
| <i>R</i> <sub>1</sub> [ <i>I</i> >2 $\sigma$ ( <i>I</i> )]              | 0.0453                                                             | 0.0410                                                             | 0.0670                                                             | 0.0270                                              |
| <i>wR</i> ( <i>F</i> <sub>2</sub> )[ <i>I</i> >2 $\sigma$ ( <i>I</i> )] | 0.1161                                                             | 0.0897                                                             | 0.1705                                                             | 0.0741                                              |
| <i>R</i> <sub>1</sub> (all data)                                        | 0.0504                                                             | 0.0552                                                             | 0.0775                                                             | 0.0290                                              |
| <i>wR</i> ( <i>F</i> <sub>2</sub> )(all data)                           | 0.1195                                                             | 0.1003                                                             | 0.1829                                                             | 0.0754                                              |
| GOF on <i>F</i> <sub>2</sub>                                            | 1.040                                                              | 1.073                                                              | 1.087                                                              | 1.026                                               |

**2. Table S2.** Crystallographic Data for Complexes **5 - 7**

|                                                                         | <b>5</b>                                            | <b>6</b>                                            | <b>7</b>                                            |
|-------------------------------------------------------------------------|-----------------------------------------------------|-----------------------------------------------------|-----------------------------------------------------|
| formula                                                                 | C <sub>28</sub> H <sub>51</sub> FeP <sub>3</sub> Si | C <sub>33</sub> H <sub>53</sub> FeP <sub>3</sub> Si | C <sub>30</sub> H <sub>49</sub> FeP <sub>3</sub> Si |
| <i>M</i> <sub>z</sub>                                                   | 564.53                                              | 626.64                                              | 586.54                                              |
| crystal system                                                          | monoclinic                                          | triclinic                                           | monoclinic                                          |
| space group                                                             | P2 <sub>1</sub> /n                                  | P-1                                                 | P2 <sub>1</sub> /n                                  |
| <i>a</i> /Å                                                             | 13.3431(2)                                          | 11.0515(4)                                          | 9.1606(2)                                           |
| <i>b</i> /Å                                                             | 16.8555(3)                                          | 17.3189(6)                                          | 16.6565(3)                                          |
| <i>c</i> /Å                                                             | 14.1692(3)                                          | 19.6938(6)                                          | 21.0567(3)                                          |
| $\alpha$ /°                                                             | 90                                                  | 69.372(3)                                           | 90                                                  |
| $\beta$ /°                                                              | 106.2564(19)                                        | 87.284(3)                                           | 101.548(2)                                          |
| $\gamma$ /°                                                             | 90                                                  | 74.966(3)                                           | 90                                                  |
| <i>V</i> [Å <sup>3</sup> ]                                              | 3059.31(10)                                         | 3402.9(2)                                           | 3147.87(10)                                         |
| <i>T</i> [K]                                                            | 173.00(10)                                          | 293(2)                                              | 172.99(10)                                          |
| <i>Z</i>                                                                | 4                                                   | 2                                                   | 4                                                   |
| $\mu$ [mm <sup>-1</sup> ]                                               | 5.905                                               | 5.361                                               | 5.761                                               |
| total reflns                                                            | 16325                                               | 37796                                               | 19552                                               |
| unique reflns                                                           | 6026                                                | 13221                                               | 6230                                                |
| <i>R</i> <sub>int</sub>                                                 | 0.0454                                              | 0.0688                                              | 0.0547                                              |
| <i>R</i> <sub>1</sub> [ <i>I</i> >2 $\sigma$ ( <i>I</i> )]              | 0.0375                                              | 0.0500                                              | 0.0381                                              |
| <i>wR</i> ( <i>F</i> <sub>2</sub> )[ <i>I</i> >2 $\sigma$ ( <i>I</i> )] | 0.0811                                              | 0.1106                                              | 0.0770                                              |
| <i>R</i> <sub>1</sub> (all data)                                        | 0.0537                                              | 0.0675                                              | 0.0514                                              |
| <i>wR</i> ( <i>F</i> <sub>2</sub> )(all data)                           | 0.0910                                              | 0.1273                                              | 0.0886                                              |
| GOF on <i>F</i> <sub>2</sub>                                            | 1.080                                               | 1.052                                               | 1.067                                               |

### 3. IR, $^1\text{H}$ , $^{31}\text{P}$ , $^{13}\text{C}$ , $^{29}\text{Si}$ NMR Spectra of Complexes **1**, **2**, **3**, **4**, **5**, **6** and **7**

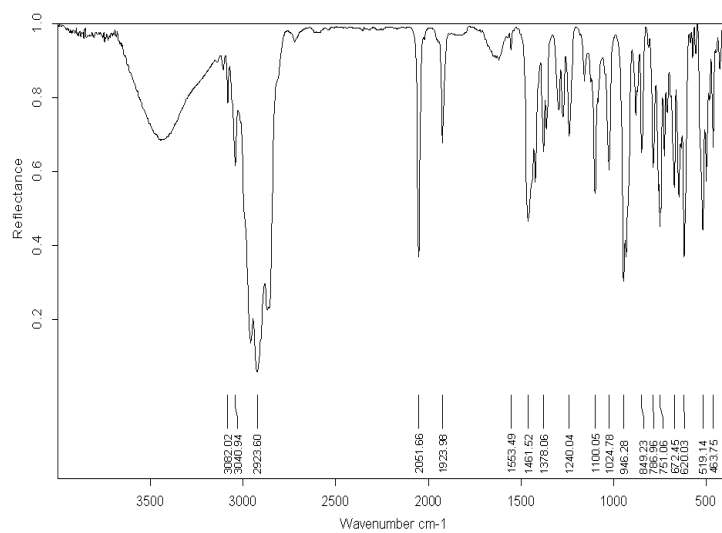

**Figure S1** The IR spectrum of complex **1**

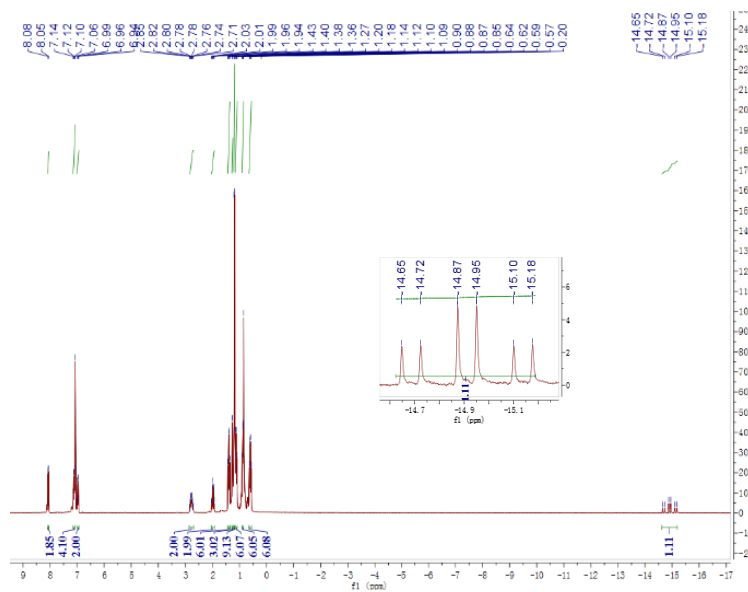

**Figure S2** The  $^1\text{H}$  NMR spectrum of complex **1**

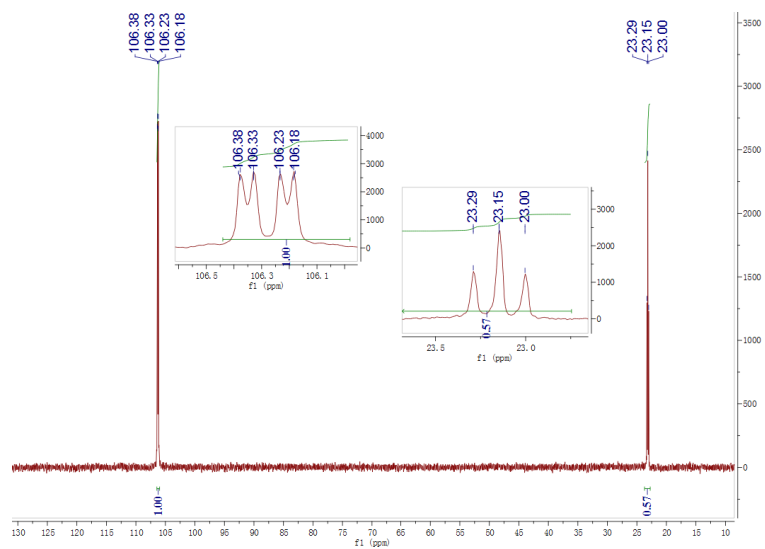

Figure S3 The  $^{31}\text{P}$  NMR spectrum of complex 1

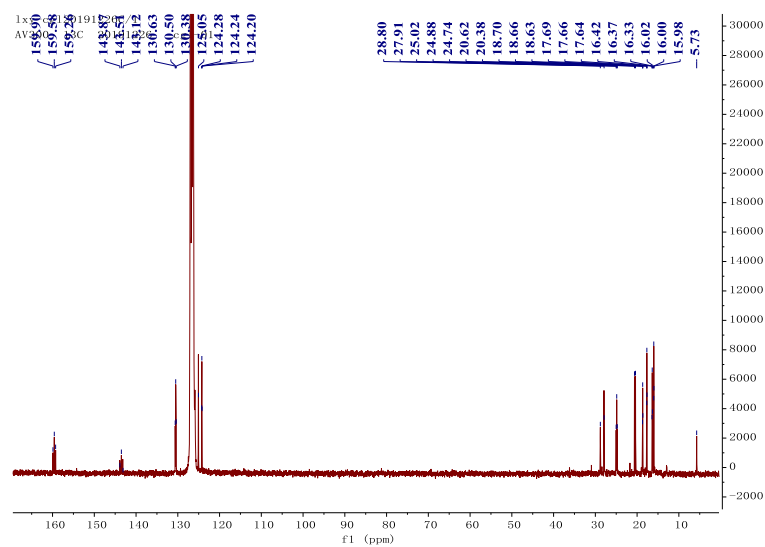

Figure S4 The  $^{13}\text{C}$  NMR spectrum of complex 1

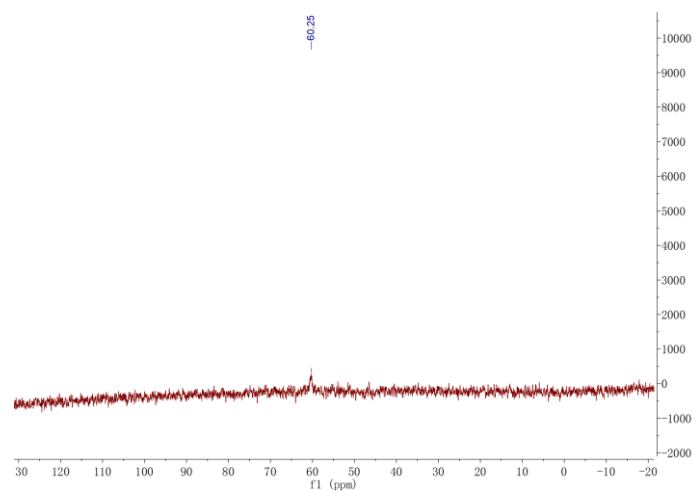

**Figure S5** The  $^{29}\text{Si}$  NMR spectrum of complex **1**

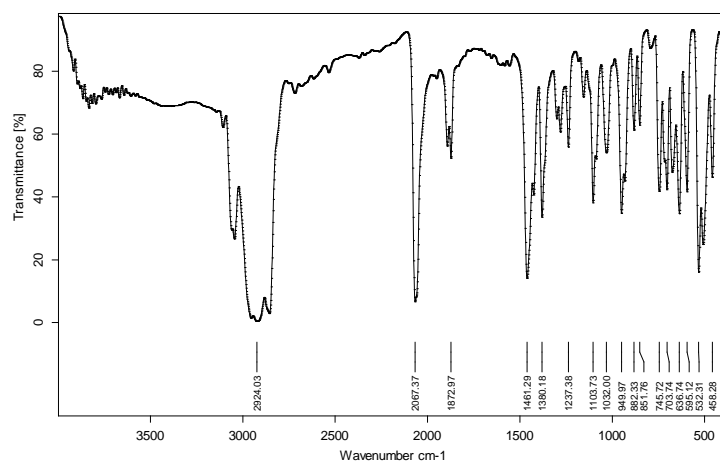

**Figure S6** The IR spectrum of complex **2**

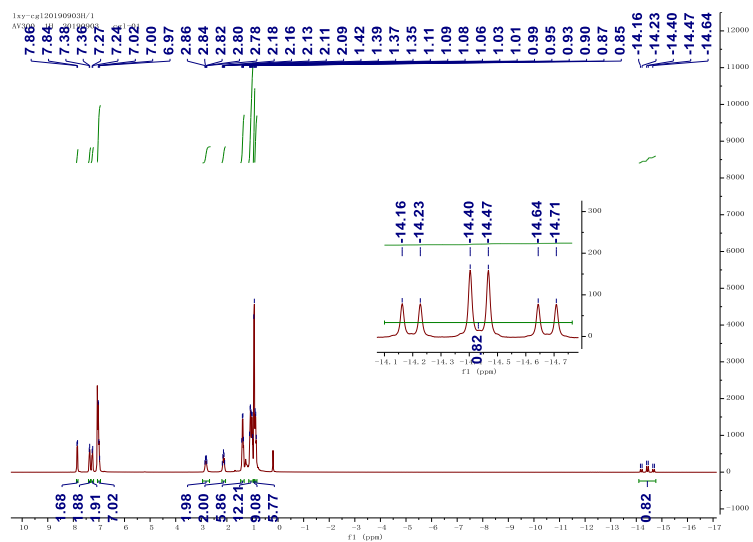

Figure S7 The  $^1\text{H}$  NMR spectrum of complex 2

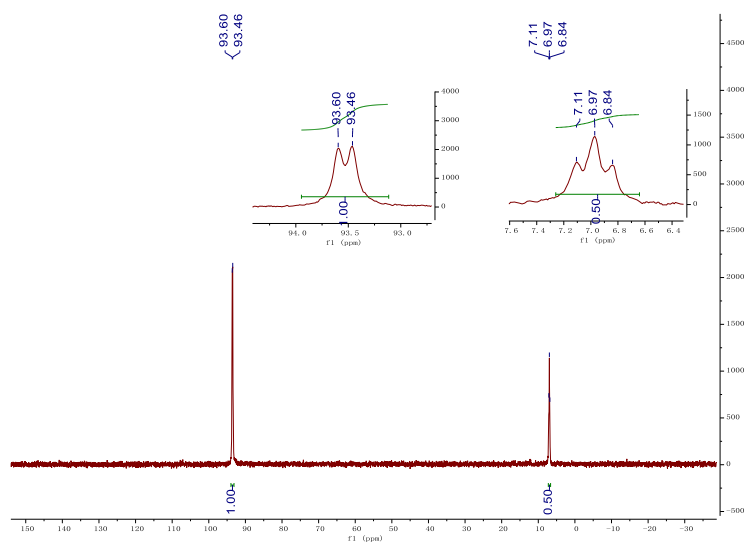

Figure S8 The  $^{31}\text{P}$  NMR spectrum of complex 2

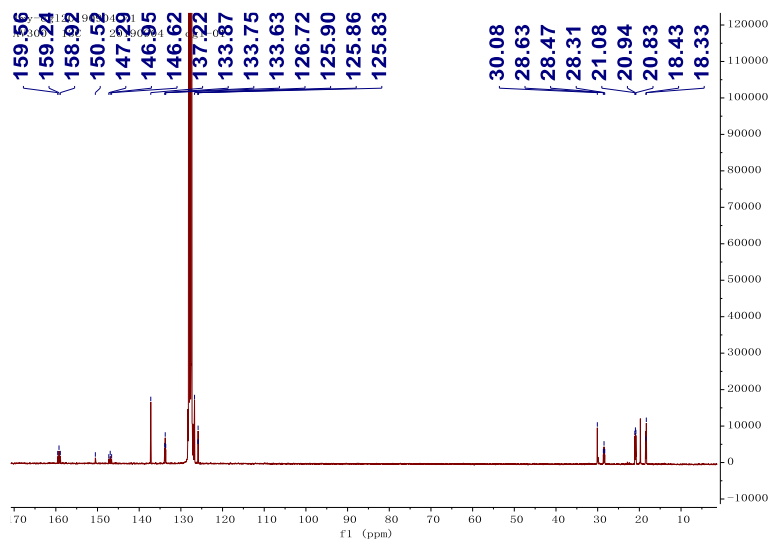

Figure S9 The  $^{13}\text{C}$  NMR spectrum of complex 2

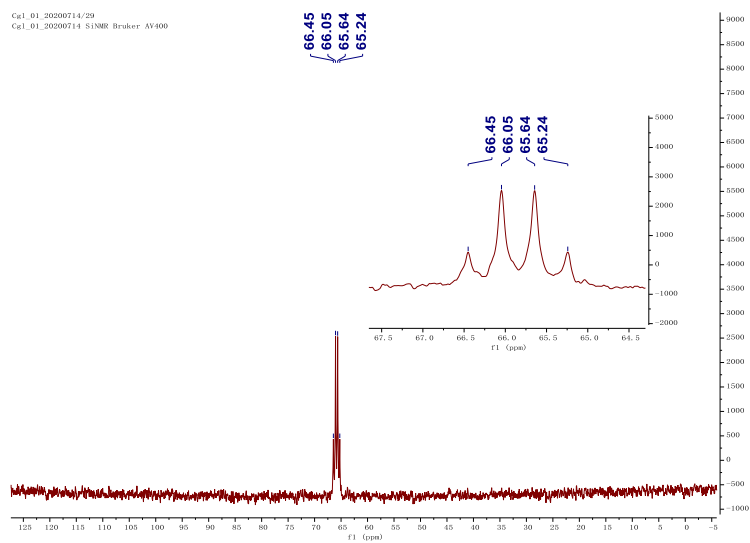

Figure S10 The  $^{29}\text{Si}$  NMR spectrum of complex 2



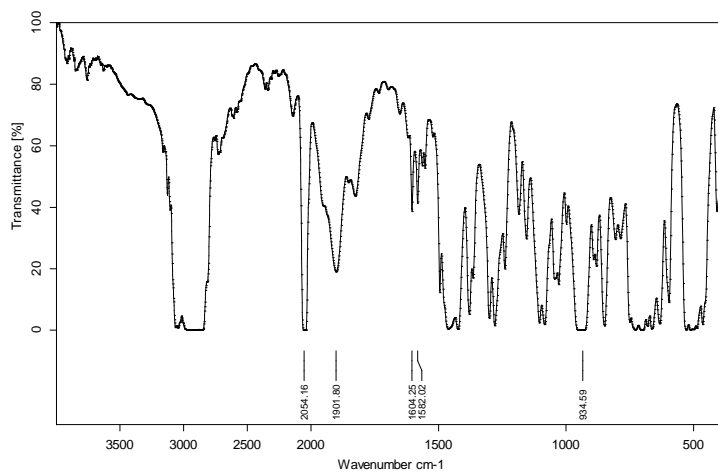

Figure S11 The IR spectrum of complex 3

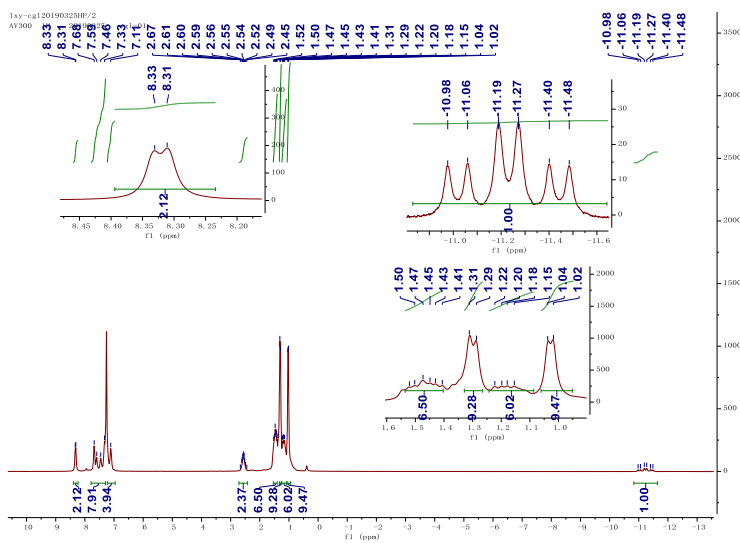

Figure S12 The <sup>1</sup>H NMR spectrum of complex 3

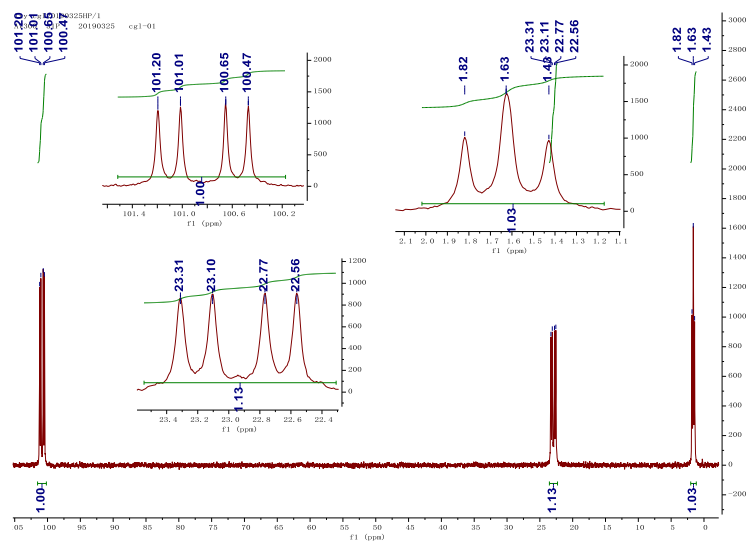

Figure S13 The  $^{31}\text{P}$  NMR spectrum of complex 3

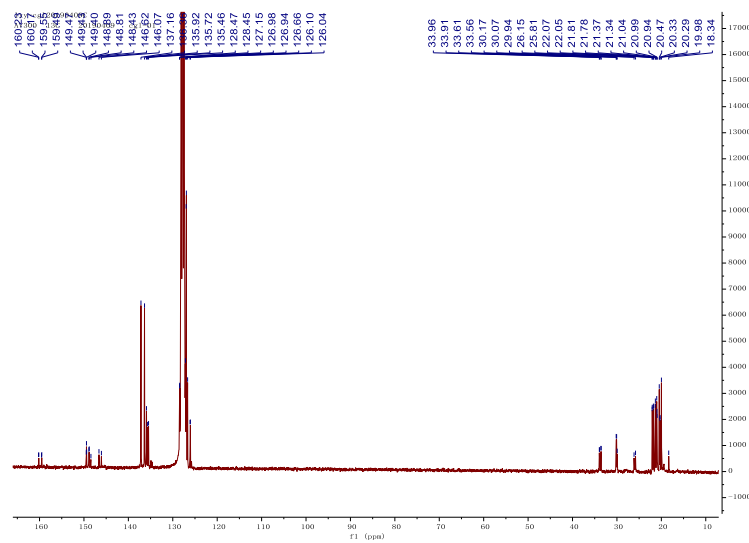

Figure S14 The  $^{13}\text{C}$  NMR spectrum of complex 3

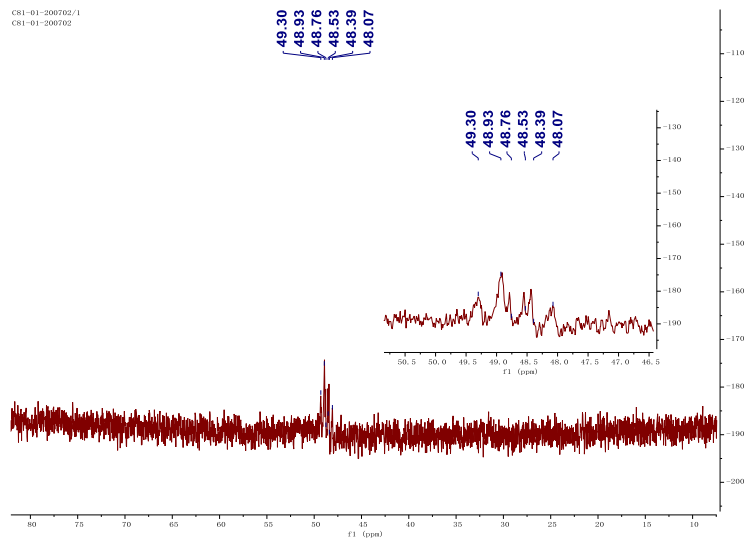

**Figure S15** The  $^{29}\text{Si}$  NMR spectrum of complex **3**

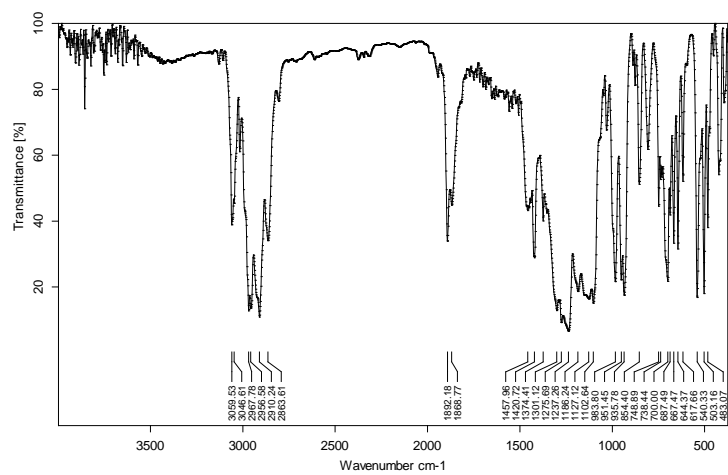

**Figure S16** The IR spectrum of complex **4**

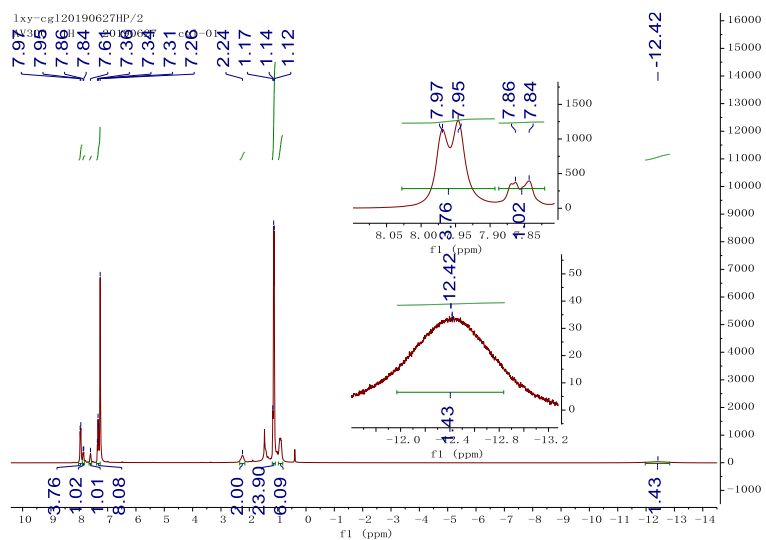

Figure S17 The <sup>1</sup>H NMR spectrum of complex 4

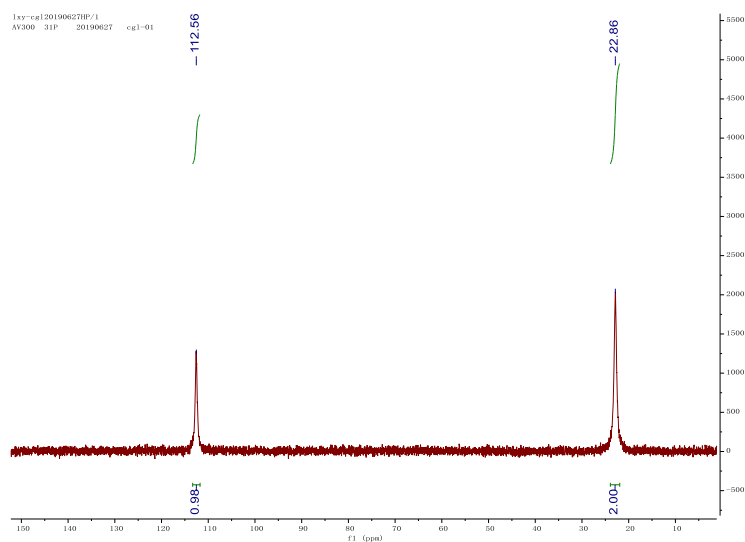

Figure S18 The <sup>31</sup>P NMR spectrum of complex 4

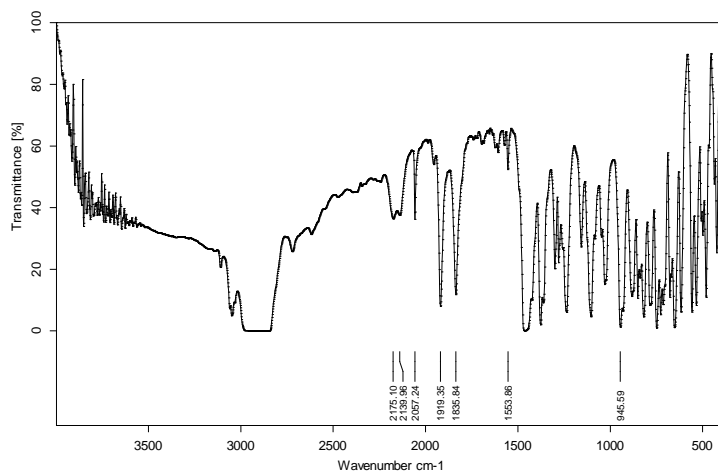

Figure S19 The IR spectrum of complex 5

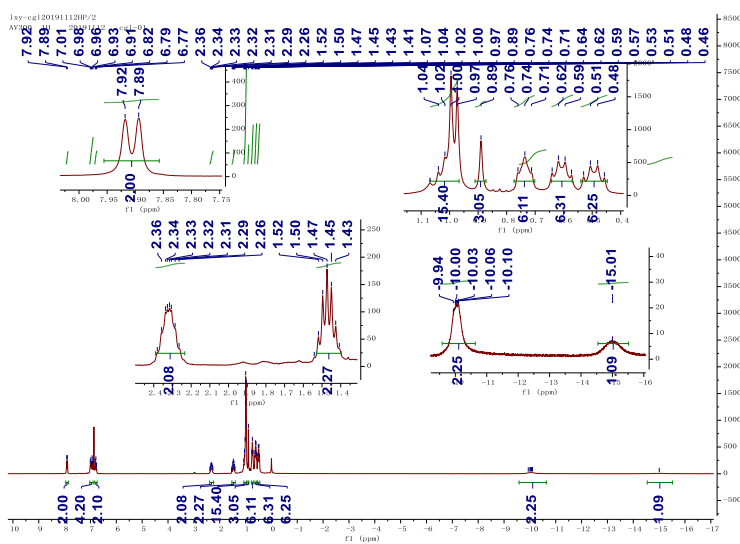

Figure S20 The <sup>1</sup>H NMR spectrum of complex 5

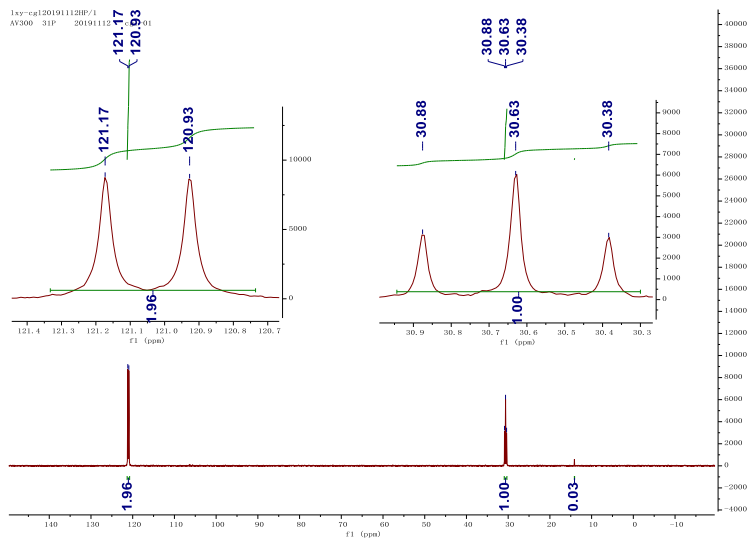

Figure S21 The  $^{31}\text{P}$  NMR spectrum of complex 5

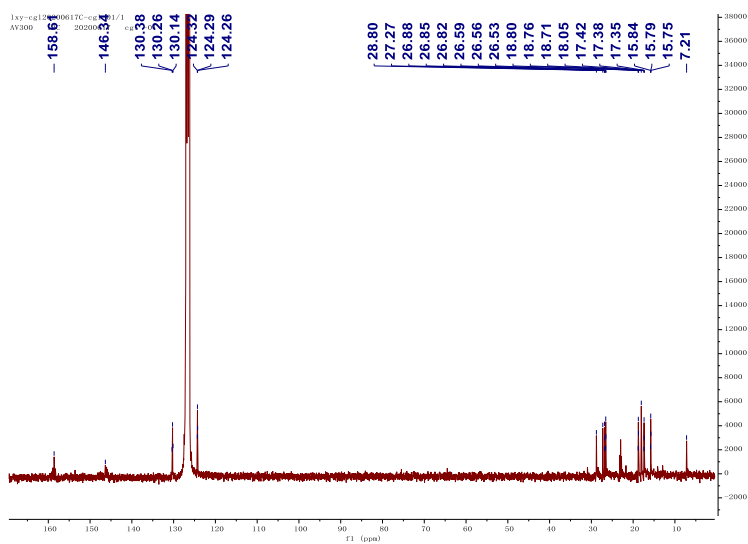

Figure S22 The  $^{13}\text{C}$  NMR spectrum of complex 5

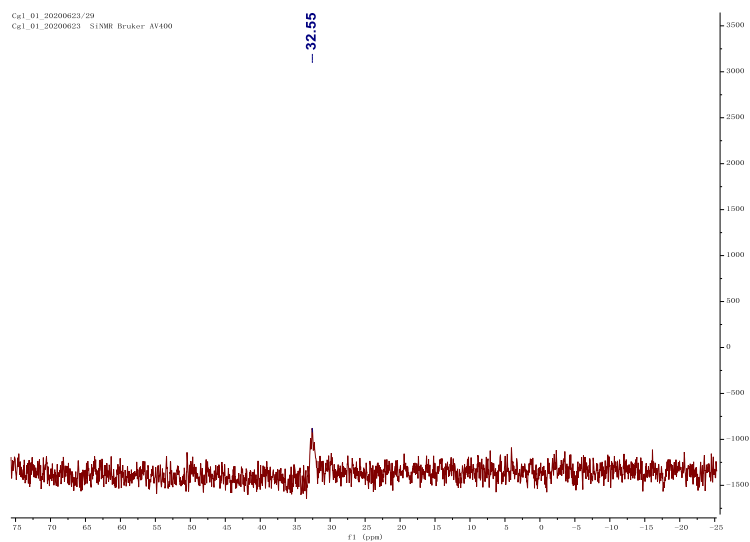

**Figure S23** The  $^{29}\text{Si}$  NMR spectrum of complex **5**

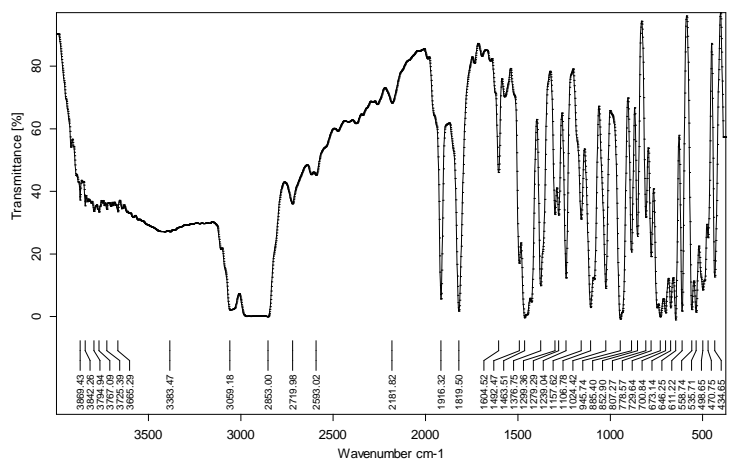

**Figure S24** The IR spectrum of complex **6**

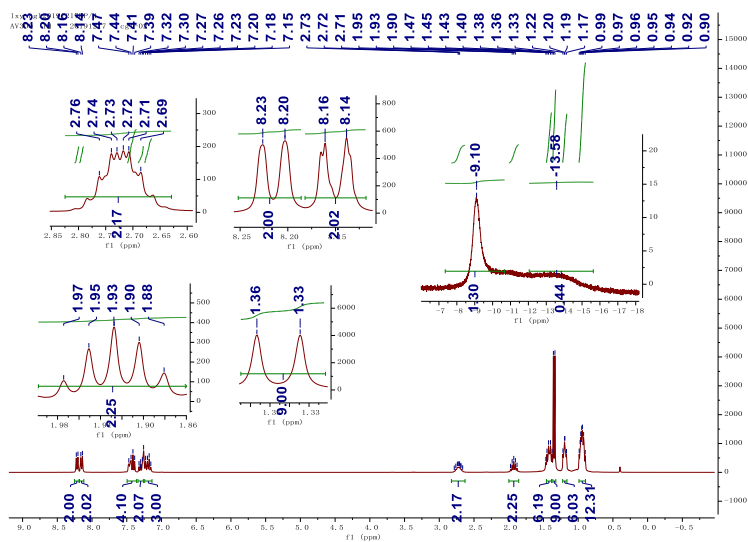

Figure S25 The  $^1\text{H}$  NMR spectrum of complex 6

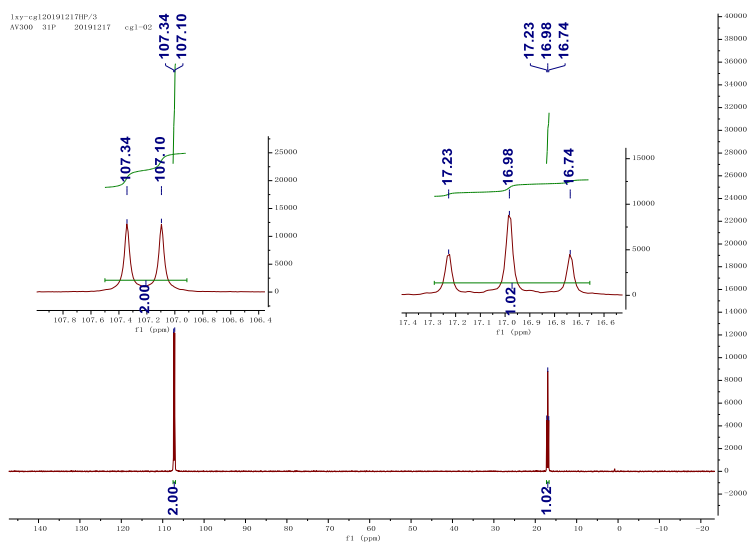

Figure S26 The  $^{31}\text{P}$  NMR spectrum of complex 6



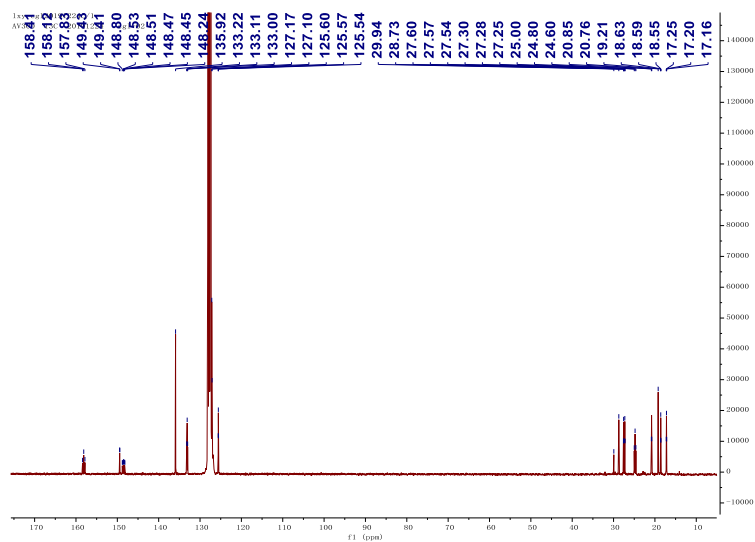

Figure S27 The  $^{13}\text{C}$  NMR spectrum of complex 6

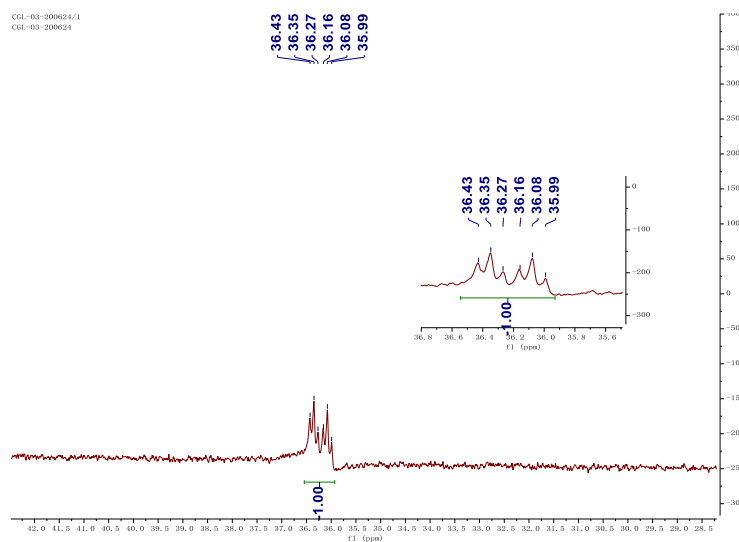

Figure S28 The  $^{29}\text{Si}$  NMR spectrum of complex 6

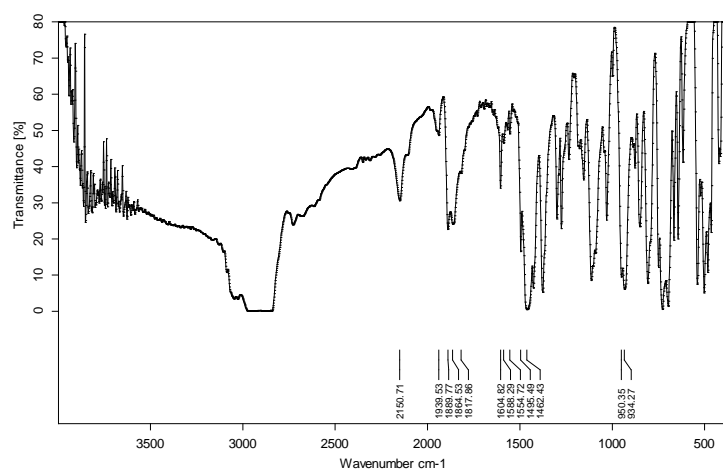

**Figure S29** The IR spectrum of complex **7**

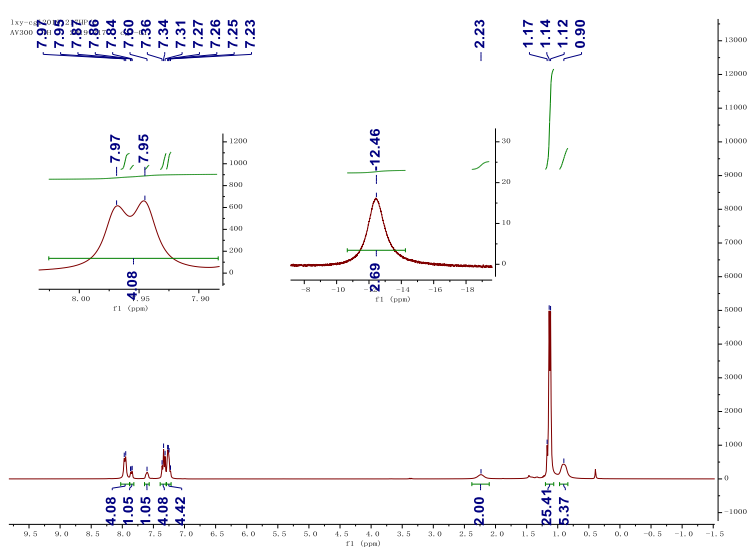

**Figure S30** The <sup>1</sup>H NMR spectrum of complex **7**

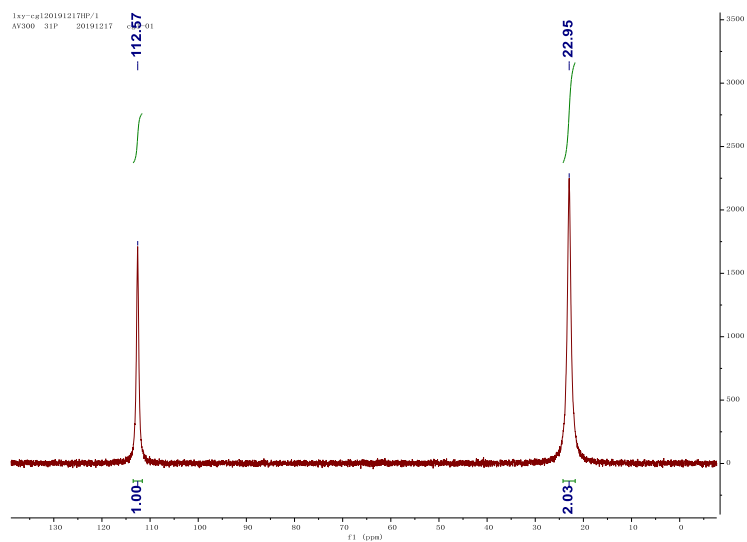

Figure S31 The  $^{31}\text{P}$  NMR spectrum of complex 7

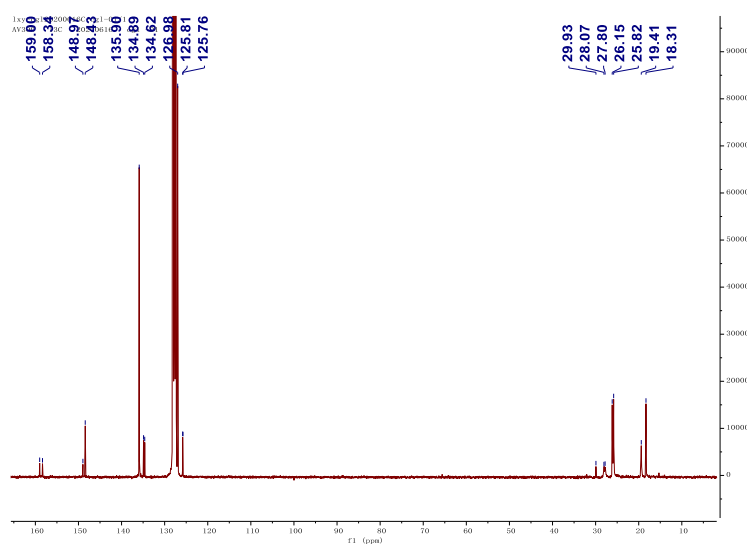

Figure S32 The  $^{13}\text{C}$  NMR spectrum of complex 7

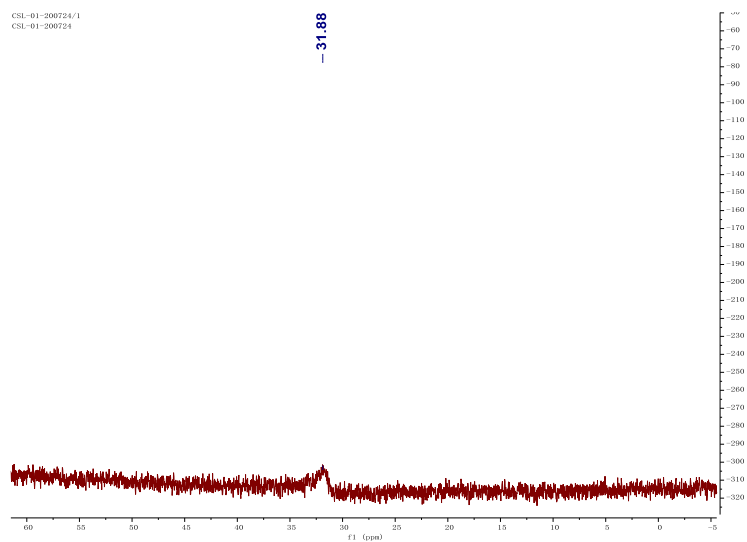

**Figure S33** The  $^{29}\text{Si}$  NMR spectrum of complex **7**
